# Supplementary material for: Deterministic and Probabilistic Dietary Exposure Assessment to Deoxynivalenol in Spain and the Catalonia Region
Source: MDPI journal article supplement (doi:10.3390/toxins14070506), 2022-07-20
Supplement: s1 [file s1]

# Supplemental Materials

**Table S1.** Normalised consumption (g/kg bw/day) of cereal-based products for the population under 18 years old from ENALIA survey for all of Spain. Mean levels and standard deviation (SD) were computed considering only consumers.

| <b>Food</b>              | <b>Age group</b>       | <b>N total</b> | <b>% cons</b> | <b>Mean</b> | <b>SD</b>   |
|--------------------------|------------------------|----------------|---------------|-------------|-------------|
| <b>White bread</b>       | <b>0-11 months</b>     | <b>182</b>     | <b>43%</b>    | <b>1.13</b> | <b>0.82</b> |
|                          | <b>12-35 months</b>    | <b>333</b>     | <b>79%</b>    | <b>1.81</b> | <b>1.21</b> |
|                          | <b>3-9 years old</b>   | <b>589</b>     | <b>95%</b>    | <b>1.59</b> | <b>0.88</b> |
|                          | <b>10-17 years old</b> | <b>627</b>     | <b>97%</b>    | <b>1.15</b> | <b>0.61</b> |
| <b>Whole bread</b>       | <b>0-11 months</b>     | <b>182</b>     | <b>1%</b>     | <b>0.89</b> | <b>0.41</b> |
|                          | <b>12-35 months</b>    | <b>333</b>     | <b>2%</b>     | <b>3.64</b> | <b>3.14</b> |
|                          | <b>3-9 years old</b>   | <b>589</b>     | <b>6%</b>     | <b>1.44</b> | <b>0.77</b> |
|                          | <b>10-17 years old</b> | <b>627</b>     | <b>9%</b>     | <b>0.98</b> | <b>0.60</b> |
| <b>Bread rusks</b>       | <b>0-11 months</b>     | <b>-</b>       | <b>-</b>      | <b>-</b>    | <b>-</b>    |
|                          | <b>12-35 months</b>    | <b>333</b>     | <b>4%</b>     | <b>0.78</b> | <b>0.74</b> |
|                          | <b>3-9 years old</b>   | <b>589</b>     | <b>5%</b>     | <b>0.56</b> | <b>0.47</b> |
|                          | <b>10-17 years old</b> | <b>627</b>     | <b>3%</b>     | <b>0.33</b> | <b>0.15</b> |
| <b>Crackers</b>          | <b>0-11 months</b>     | <b>182</b>     | <b>5%</b>     | <b>0.31</b> | <b>0.11</b> |
|                          | <b>12-35 months</b>    | <b>333</b>     | <b>12%</b>    | <b>0.98</b> | <b>2.20</b> |
|                          | <b>3-9 years old</b>   | <b>589</b>     | <b>5%</b>     | <b>0.92</b> | <b>0.96</b> |
|                          | <b>10-17 years old</b> | <b>627</b>     | <b>5%</b>     | <b>0.55</b> | <b>0.64</b> |
| <b>Cookies</b>           | <b>0-11 months</b>     | <b>182</b>     | <b>81%</b>    | <b>1.04</b> | <b>0.55</b> |
|                          | <b>12-35 months</b>    | <b>333</b>     | <b>74%</b>    | <b>1.37</b> | <b>0.83</b> |
|                          | <b>3-9 years old</b>   | <b>589</b>     | <b>48%</b>    | <b>1.27</b> | <b>0.78</b> |
|                          | <b>10-17 years old</b> | <b>627</b>     | <b>34%</b>    | <b>0.79</b> | <b>0.50</b> |
| <b>Other cookies</b>     | <b>0-11 months</b>     | <b>-</b>       | <b>-</b>      | <b>-</b>    | <b>-</b>    |
|                          | <b>12-35 months</b>    | <b>333</b>     | <b>1%</b>     | <b>1.54</b> | <b>0.95</b> |
|                          | <b>3-9 years old</b>   | <b>589</b>     | <b>3%</b>     | <b>1.62</b> | <b>1.10</b> |
|                          | <b>10-17 years old</b> | <b>627</b>     | <b>2%</b>     | <b>1.30</b> | <b>1.12</b> |
| <b>Muffins</b>           | <b>0-11 months</b>     | <b>182</b>     | <b>1%</b>     | <b>3.33</b> | <b>-</b>    |
|                          | <b>12-35 months</b>    | <b>333</b>     | <b>10%</b>    | <b>2.55</b> | <b>1.06</b> |
|                          | <b>3-9 years old</b>   | <b>589</b>     | <b>16%</b>    | <b>1.73</b> | <b>0.79</b> |
|                          | <b>10-17 years old</b> | <b>627</b>     | <b>16%</b>    | <b>1.08</b> | <b>0.59</b> |
| <b>Cake</b>              | <b>0-11 months</b>     | <b>-</b>       | <b>-</b>      | <b>-</b>    | <b>-</b>    |
|                          | <b>12-35 months</b>    | <b>333</b>     | <b>0.30%</b>  | <b>7.89</b> | <b>-</b>    |
|                          | <b>3-9 years old</b>   | <b>589</b>     | <b>1%</b>     | <b>3.91</b> | <b>1.93</b> |
|                          | <b>10-17 years old</b> | <b>627</b>     | <b>2%</b>     | <b>2.06</b> | <b>0.83</b> |
| <b>Breakfast cereals</b> | <b>0-11 months</b>     | <b>182</b>     | <b>2%</b>     | <b>2.92</b> | <b>3.18</b> |
|                          | <b>12-35 months</b>    | <b>333</b>     | <b>3%</b>     | <b>1.75</b> | <b>1.35</b> |
|                          | <b>3-9 years old</b>   | <b>589</b>     | <b>9%</b>     | <b>1.13</b> | <b>0.95</b> |
|                          | <b>10-17 years old</b> | <b>627</b>     | <b>8%</b>     | <b>0.69</b> | <b>0.49</b> |
| <b>Pasta</b>             | <b>0-11 months</b>     | <b>182</b>     | <b>9%</b>     | <b>2.28</b> | <b>1.60</b> |
|                          | <b>12-35 months</b>    | <b>333</b>     | <b>49%</b>    | <b>2.38</b> | <b>1.70</b> |
|                          | <b>3-9 years old</b>   | <b>589</b>     | <b>58%</b>    | <b>1.76</b> | <b>1.32</b> |
|                          | <b>10-17 years old</b> | <b>627</b>     | <b>59%</b>    | <b>1.10</b> | <b>0.92</b> |

**Table S2.** Recovery percentages and limit of detection (LOD) of the method used for the determination of the analysed mycotoxins.

| <b>Mycotoxin</b> | <b>ppb</b> | <b>Recovery (%)</b> | <b>LOD<br/>(µg/kg)</b> |
|------------------|------------|---------------------|------------------------|
| DON              | 200        | 108.9               | 2                      |
|                  | 300        | 106.8               | 2                      |
|                  | 400        | 108.3               | 2                      |
|                  | 600        | 107.6               | 2                      |
|                  | 800        | 104.6               | 2                      |
| 15-Ac-DON        | 12.5       | 104.0               | 3                      |
|                  | 18.75      | 105.1               | 3                      |
|                  | 25         | 113.3               | 3                      |
|                  | 37.5       | 106.7               | 3                      |
|                  | 50         | 101.9               | 3                      |
| 3-Ac-DON         | 25         | 102.6               | 3                      |
|                  | 37.5       | 100.6               | 3                      |
|                  | 50         | 102.0               | 3                      |
|                  | 75         | 107.9               | 3                      |
|                  | 100        | 105.0               | 3                      |
| 3GDON            | 20         | 102.6               | 10                     |
|                  | 30         | 100.3               | 10                     |
|                  | 40         | 102.5               | 10                     |
|                  | 60         | 101.1               | 10                     |
|                  | 80         | 100.2               | 10                     |

Abbreviations: 3-Ac-DON, 3-acetyl-deoxynivalenol; 15-Ac-DON, 15-acetyl-deoxynivalenol; DON, Deoxynivalenol; 3GDON, Deoxynivalenol-3-glucoside; LOD, Limit of Detection

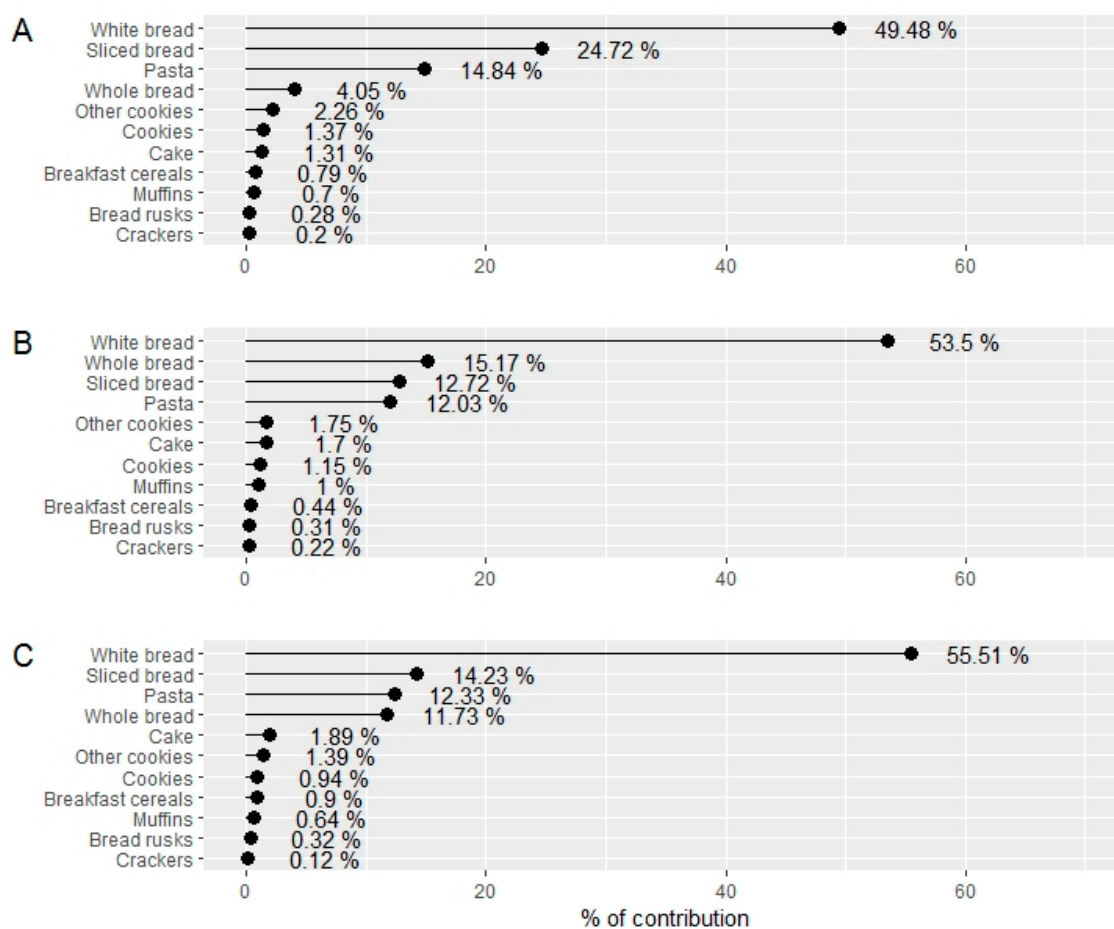

**Figure S1.** Contribution of cereal-based products to the global exposure to deoxynivalenol among adults from Spain. The exposure was estimated with the deterministic method for the 18–40 years old group (A), 41–60 years old group (B) and > 60 years old group (C).

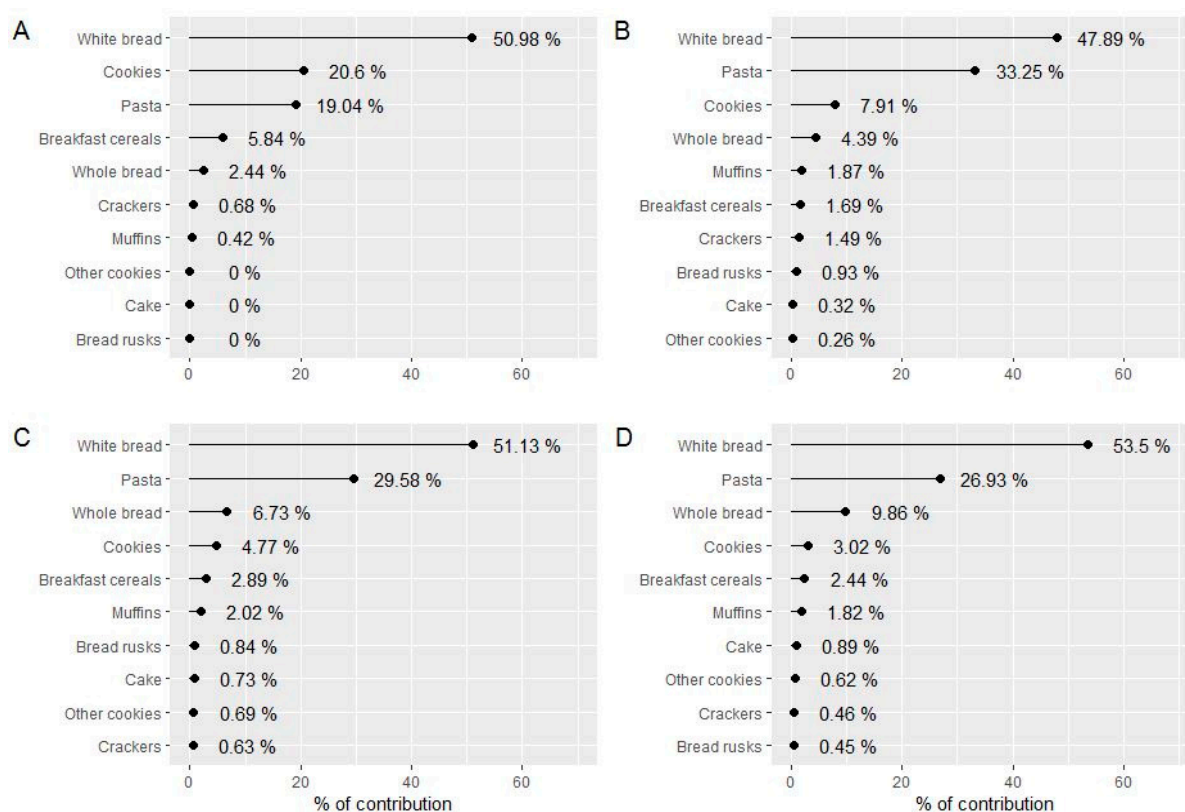

**Figure S2.** Contribution of cereal-based products to the global exposure to deoxynivalenol among children and adolescents from Spain. The exposure was estimated with the deterministic method for the 0–11 months old group (A), 12–35 months old group (B), 3–9 years old group (C) and for 10–17 years old group (D).
